# Supplementary material
Source: HighWire-hosted journal article supplement (https://jnm.snmjournals.org/highwire/filestream/100093/field_highwire_adjunct_files/0/248658_Supplemental_Data.pdf)
Supplement: 248658_Supplemental_Data.pdf [file 248658_Supplemental_Data.pdf]

**Supplemental Table 1. Hematotoxicity, hepatotoxicity and nephrotoxicity after PRRT according to CTCAE v.5.0**

|         |     | Baseline    | 1 <sup>st</sup> cycle |             | 2 <sup>nd</sup> cycle |             | 3 <sup>rd</sup> cycle |         |
|---------|-----|-------------|-----------------------|-------------|-----------------------|-------------|-----------------------|---------|
|         |     |             | 1 week                | 4 weeks     | 1 week                | 4 weeks     | 1 week                | 4 weeks |
| Group A | WBC | 0/12        | 0/12                  | 0/12        | 0/12                  | 0/12        | 0/9                   | 0/9     |
|         | PLT | 0/12        | 0/12                  | 0/12        | 0/12                  | 0/12        | 0/9                   | 0/9     |
|         | Hb  | 0/12        | 0/12                  | 0/12        | 0/12                  | 0/12        | 0/9                   | 0/9     |
|         | ALT | <b>1/11</b> | 0/12                  | 0/12        | 0/12                  | 0/12        | 0/9                   | 0/9     |
|         | AST | 0/12        | <b>1/11</b>           | 0/12        | 0/12                  | 0/12        | 0/9                   | 0/9     |
|         | ALP | 0/12        | 0/12                  | 0/12        | 0/12                  | 0/12        | 0/9                   | 0/9     |
|         | Cr  | 0/12        | 0/12                  | 0/12        | 0/12                  | 0/12        | 0/9                   | 0/9     |
| Group B | WBC | 0/6         | 0/6                   | 0/6         | 0/5                   | 0/5         | 0/5                   | 0/5     |
|         | PLT | 0/6         | 0/6                   | 0/6         | <b>1/4</b>            | <b>1/4</b>  | 0/5                   | 0/5     |
|         | Hb  | 0/6         | 0/6                   | 0/6         | 0/5                   | 0/5         | 0/5                   | 0/5     |
|         | ALT | 0/6         | 0/6                   | 0/6         | 0/5                   | 0/5         | 0/5                   | 0/5     |
|         | AST | 0/6         | 0/6                   | 0/6         | 0/5                   | 0/5         | 0/5                   | 0/5     |
|         | ALP | 1/5         | 0/6                   | 0/6         | 0/5                   | 0/5         | 0/5                   | 0/5     |
|         | Cr  | 0/6         | 0/6                   | 0/6         | 0/5                   | 0/5         | 0/5                   | 0/5     |
| Group C | WBC | 0/14        | 0/14                  | 0/14        | 0/13                  | 0/13        | 0/8                   | 0/8     |
|         | PLT | 0/14        | 0/14                  | <b>2/12</b> | <b>1/12</b>           | <b>1/12</b> | 0/8                   | 0/8     |
|         | Hb  | <b>1/13</b> | 0/14                  | <b>1/13</b> | 0/13                  | 0/13        | 0/8                   | 0/8     |
|         | ALT | 0/14        | 0/14                  | 0/14        | 0/13                  | 0/13        | 0/8                   | 0/8     |
|         | AST | 0/14        | 0/14                  | <b>1/13</b> | 0/13                  | 0/13        | 0/8                   | 0/8     |
|         | ALP | 0/14        | 0/14                  | 0/14        | 0/13                  | 0/13        | 0/8                   | 0/8     |
|         | Cr  | 0/14        | 0/14                  | 0/14        | 0/13                  | 0/13        | 0/8                   | 0/8     |

**The ratios: (cases with CTC-3) / (cases with CTC-0, CTC-1, and CTC-2)**

WBC: white blood cell; Hb: hemoglobin; PLT: platelet; ALT: alanine aminotransferase;

AST: aspartate aminotransferase; Cr: creatine; ALP: alkaline phosphatase

**Supplemental Table 2. Changes of hematological parameters, liver and renal function between baseline and 4 weeks after**

**PRRT in groups A-C**

| <b>Hematological parameters</b> |                 |                 |                 |                 |                                                              |                                                            |                                                            |                                                            |                 |
|---------------------------------|-----------------|-----------------|-----------------|-----------------|--------------------------------------------------------------|------------------------------------------------------------|------------------------------------------------------------|------------------------------------------------------------|-----------------|
| Group                           | ΔWBC%           |                 |                 | ΔHb%            |                                                              |                                                            | ΔPLT%                                                      |                                                            |                 |
|                                 | 1 <sup>st</sup> | 2 <sup>nd</sup> | 3 <sup>rd</sup> | 1 <sup>st</sup> | 2 <sup>nd</sup>                                              | 3 <sup>rd</sup>                                            | 1 <sup>st</sup>                                            | 2 <sup>nd</sup>                                            | 3 <sup>rd</sup> |
| Group A                         | -4.7±12.7       | -10.9±16.7      | -5.7±29.2       | -0.1±3.7        | 1.8±9.2                                                      | 7.1±12.6                                                   | -13.9±9.5                                                  | -16.6±19.3                                                 | -23.3±18.5      |
| Group B                         | -3.4±42.1       | -21.7±21.9      | -35.3±25.4      | 2.8±8.5         | 5.3±10.8                                                     | 1.1±11.1                                                   | -0.1±23.0                                                  | -8.4±40.5                                                  | -3.3±42.7       |
| Group C                         | -12.2±29.8      | -22.3±39.7      | -11.1±58.0      | -9.6±9.5        | -14.1±7.8                                                    | -17.2±14.4                                                 | -26.3±27.0                                                 | -29.4±33.7                                                 | -40.9±25.5      |
| <i>P</i> value                  | NS              | NS              | NS              | NS              | <0.001<br>(<0.001 <sup>A,C</sup> ,<br>0.001 <sup>B,C</sup> ) | 0.015<br>(0.004 <sup>A,C</sup> ,<br>0.011 <sup>B,C</sup> ) | NS                                                         | NS                                                         | NS              |
| <b>Liver and renal function</b> |                 |                 |                 |                 |                                                              |                                                            |                                                            |                                                            |                 |
| Group                           | ΔALT%           |                 |                 | ΔAST%           |                                                              |                                                            | ΔCr%                                                       |                                                            |                 |
|                                 | 1 <sup>st</sup> | 2 <sup>nd</sup> | 3 <sup>rd</sup> | 1 <sup>st</sup> | 2 <sup>nd</sup>                                              | 3 <sup>rd</sup>                                            | 1 <sup>st</sup>                                            | 2 <sup>nd</sup>                                            | 3 <sup>rd</sup> |
| Group A                         | 10.3±59.1       | 62.8±215.8      | 1.2±49.7        | 9.0±43.8        | 19.5±63.5                                                    | -5.0±29.2                                                  | 13.8±21.0                                                  | 11.5±18.6                                                  | 10.5±22.9       |
| Group B                         | -22.4±25.1      | -32.4±21.1      | -34.5±20.4      | -24.9±27.5      | -30.0±25.7                                                   | -34.2±30.4                                                 | -6.6±16.7                                                  | -10.2±16.6                                                 | -11.5±15.6      |
| Group C                         | 53.0±102.2      | 22.9±98.3       | 17.6±26.3       | 53.0±102.2      | 22.9±98.3                                                    | 20.0±26.9                                                  | -6.4±19.0                                                  | -6.3±11.0                                                  | -4.1±18.4       |
| <i>P</i> value                  | NS              | NS              | NS              | NS              | NS                                                           | NS                                                         | 0.040<br>(0.035 <sup>A,B</sup> ,<br>0.010 <sup>A,C</sup> ) | 0.033<br>(0.016 <sup>A,B</sup> ,<br>0.011 <sup>A,C</sup> ) | NS              |

NS: not significant; WBC: white blood cell; Hb: hemoglobin; PLT: platelet; ALT: alanine aminotransferase; AST: aspartate aminotransferase; Cr: creatine

**Supplemental Table 3. Response evaluation by molecular imaging (<sup>68</sup>Ga-DOTATATE PET/CT) referring to EORTC and modified PERCIST criteria**

| Efficacy | Group A                          |                                  |                                 |           | Group B                         |                                 |                                 |           | Group C                          |                                  |                                 |           |
|----------|----------------------------------|----------------------------------|---------------------------------|-----------|---------------------------------|---------------------------------|---------------------------------|-----------|----------------------------------|----------------------------------|---------------------------------|-----------|
|          | 1 <sup>st</sup> cycle<br>(n= 12) | 2 <sup>nd</sup> cycle<br>(n= 12) | 3 <sup>rd</sup> cycle<br>(n= 9) | Overall   | 1 <sup>st</sup> cycle<br>(n= 6) | 2 <sup>nd</sup> cycle<br>(n= 5) | 3 <sup>rd</sup> cycle<br>(n= 5) | Overall   | 1 <sup>st</sup> cycle<br>(n= 14) | 2 <sup>nd</sup> cycle<br>(n= 13) | 3 <sup>rd</sup> cycle<br>(n= 8) | Overall   |
| CR (%)   | 0.0/0.0                          | 0.0/0.0                          | 0.0/0.0                         | 0.0/0.0   | 0.0/0.0                         | 0.0/0.0                         | 0.0/0.0                         | 0.0/0.0   | 0.0/0.0                          | 0.0/0.0                          | 0.0/0.0                         | 0.0/0.0   |
| PR (%)   | 50.0/16.7                        | 41.7/25.0                        | 44.4/22.2                       | 50.0/33.3 | 50.0/33.3                       | 60.0/60.0                       | 60.0/40.0                       | 50.0/33.3 | 50.0/14.3                        | 30.8/30.8                        | 37.5/37.5                       | 42.9/35.7 |
| SD (%)   | 33.3/66.7                        | 33.3/50.0                        | 22.2/44.4                       | 16.7/33.3 | 50.0/66.7                       | 40.0/40.0                       | 40.0/60.0                       | 33.3/66.7 | 42.9/71.4                        | 38.5/38.5                        | 25.0/37.5                       | 28.6/42.9 |
| PD (%)   | 16.7/16.7                        | 25.0/25.0                        | 33.3/33.3                       | 33.3/33.3 | 0.0/0.0                         | 0.0/0.0                         | 0.0/0.0                         | 16.7/0.0  | 7.1/14.3                         | 23.1/23.1                        | 25.0/12.5                       | 28.6/21.4 |
| NA (%)   | 0.0/0.0                          | 0.0/0.0                          | 0.0/0.0                         | -         | 0.0/0.0                         | 0.0/0.0                         | 0.0/0.0                         | -         | 0.0/0.0                          | 7.7/7.7                          | 12.5/12.5                       | -         |
| DRR (%)  | 50.0/16.7                        | 41.7/25.0                        | 44.4/22.2                       | 50.0/33.3 | 50.0/33.3                       | 60.0/60.0                       | 60.0/40.0                       | 50.0/33.3 | 50.0/14.3                        | 30.8/30.8                        | 37.5/37.5                       | 42.9/35.7 |
| DCR (%)  | 83.3/83.3                        | 75.0/75.0                        | 66.7/66.7                       | 66.7/66.7 | 100/100                         | 100/100                         | 100/100                         | 83.3/100  | 92.9/85.7                        | 69.3/69.3                        | 62.5/75.0                       | 71.5/78.6 |

**The ratios: (rate with EORTC criteria) / (rate with modified PERCIST criteria)**

NA: not available; DRR: disease response rate (CR+PR); DCR: disease control rate (CR+PR+SD)

**Supplemental Table 4. Comparison of  $\Delta$ SUVmax% among groups A-C in all patients when selecting comparable baseline SUVmax ranging from 15 to 40**

| Group          | 1 <sup>st</sup> cycle                                  | 2 <sup>nd</sup> cycle | 3 <sup>rd</sup> cycle            |
|----------------|--------------------------------------------------------|-----------------------|----------------------------------|
| Group A        | 2.1±40.8                                               | -9.3±41.1             | -6.9±42.3                        |
| Group B        | -38.7±10.0                                             | -38.4±37.8            | -49.2±30.9                       |
| Group C        | -14.7±20.0                                             | -21.2±23.2            | -11.9±37.9                       |
| <i>P</i> value | 0.001<br>(0.001 <sup>A,B</sup> ,0.006 <sup>B,C</sup> ) | 0.135                 | 0.044<br>(0.019 <sup>B,C</sup> ) |

**Supplemental Table 5. Comparison of  $\Delta$ SUVmax% among groups A-C in patients who received 3 cycles of PRRT when selecting comparable baseline SUVmax ranging from 15 to 40**

| Group          | 1 <sup>st</sup> cycle            | 2 <sup>nd</sup> cycle | 3 <sup>rd</sup> cycle            |
|----------------|----------------------------------|-----------------------|----------------------------------|
| Group A        | -8.2±32.1                        | -15.0±37.8            | -3.7±47.7                        |
| Group B        | -38.7±10.0                       | -38.4±37.8            | -49.2±30.9                       |
| Group C        | -15.8±26.5                       | -6.9±17.1             | -11.9±37.9                       |
| <i>P</i> value | 0.025<br>(0.039 <sup>A,B</sup> ) | 0.113                 | 0.039<br>(0.016 <sup>A,B</sup> ) |

**Supplemental Table 6. Comparison of tumor SUVmax between baseline and post-therapy among groups A-C in patients who received 3 cycles of PRRT**

| Group   | Baseline SUVmax | Post-Therapy SUVmax   |          |                       |          |                       |          |
|---------|-----------------|-----------------------|----------|-----------------------|----------|-----------------------|----------|
|         |                 | 1 <sup>st</sup> cycle | <i>P</i> | 2 <sup>nd</sup> cycle | <i>P</i> | 3 <sup>rd</sup> cycle | <i>P</i> |
| Group A | 28.4±27.7       | 28.3±36.5             | 0.966    | 26.3±34.4             | 0.450    | 29.9±40.4             | 0.712    |
| Group B | 48.0±53.7       | 34.7±39.9             | 0.002    | 34.3±41.5             | 0.003    | 33.6±42.2             | 0.006    |
| Group C | 32.5±24.4       | 20.5±7.7              | 0.019    | 20.4±6.8              | 0.035    | 20.4±8.9              | 0.036    |
